CORRECTION

# Correction: Dissecting cancer heterogeneity based on dimension reduction of transcriptomic profiles using extreme learning machines

Kejun Wang, Xin Duan, Feng Gao, Wei Wang, Liangliang Liu, Xin Wang

An affiliation for the 6<sup>th</sup> author is not included. Xin Wang is affiliated with both #2 and #3, Shenzhen Research Institute, City University of Hong Kong, Shenzhen, China.

The following information is missing from the Funding section: The authors acknowledge the support received from Shenzhen Research Institute, City University of Hong Kong.

## Reference

1. Wang K, Duan X, Gao F, Wang W, Liu L, Wang X (2018) Dissecting cancer heterogeneity based on dimension reduction of transcriptomic profiles using extreme learning machines. PLoS ONE 13(9): e0203824. <https://doi.org/10.1371/journal.pone.0203824> PMID: 30216380

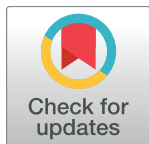

## OPEN ACCESS

**Citation:** Wang K, Duan X, Gao F, Wang W, Liu L, Wang X (2018) Correction: Dissecting cancer heterogeneity based on dimension reduction of transcriptomic profiles using extreme learning machines. PLoS ONE 13(10): e0205548. <https://doi.org/10.1371/journal.pone.0205548>

**Published:** October 5, 2018

**Copyright:** © 2018 Wang et al. This is an open access article distributed under the terms of the [Creative Commons Attribution License](https://creativecommons.org/licenses/by/4.0/), which permits unrestricted use, distribution, and reproduction in any medium, provided the original author and source are credited.
